# Supplementary material
Source: Springer Nature journal article supplement (https://www.springermedizin.de/resource/supplementary/12913_2007_468_MOESM6_ESM.pdf/9534830)
Supplement: MOESM6 [file 9534830]

| <b>Performance objectives for the employee.</b>                                                                | <b>Change objectives</b>                                                           |                                          |
|----------------------------------------------------------------------------------------------------------------|------------------------------------------------------------------------------------|------------------------------------------|
|                                                                                                                | <b>Safety and equality</b>                                                         | <b>Support</b>                           |
| Employee is able to identify and prioritise (mental and physical workload) obstacles for a safe and early RTW. | RTW-coordinator provides clearness about how to identify and prioritize obstacles. | OP provides tools to identify stressors. |
